# Supplementary material for: Ti3C2 MXene as a new nanofiller for robust and conductive elastomer composites
Source: Royal Society of Chemistry journal article supplement (doi:10.1039/c9nr03661j), 2019-01-01
Supplement: c9nr03661j1.pdf [file c9nr03661j1.pdf]

## Electronic Supplementary Information

### **Ti<sub>3</sub>C<sub>2</sub> MXene as A New Nanofiller for Robust and Conductive Elastomer Composites**

Qunyang Li<sup>1, &</sup>, Bangchao Zhong<sup>1, &</sup>, Wenqiang Zhang<sup>1</sup>, Zhixin Jia<sup>1, \*</sup>, Demin Jia<sup>1</sup>, Si Qin<sup>2</sup>, Jing Wang<sup>2</sup>, Joselito M. Razal<sup>2, \*</sup>, Xungai Wang<sup>2</sup>

<sup>1</sup>Key Lab of Guangdong for High Property and Functional Polymer Materials, South China University of Technology, No. 381 Wushan Road, Guangzhou 510640, China.

<sup>2</sup>Institute for Frontier Materials, Deakin University, Geelong Waurin Ponds Campus, Geelong, Victoria 3216, Australia.

\*Corresponding author, E-mail address: 18620901980m@sina.cn (Zhixin Jia);  
joselito.razal@deakin.edu.au (Joselito M. Razal)

<sup>&</sup>Qunyang Li and Bangchao Zhong contributed equally to this work.

**Table S1** Comparison of tensile strength and thermal conductivity with previously reported SBR composites.

| Rubber | Filler                  | Filler Content | Tensile strength (MPa) | Thermal conductivity ( $\text{W}\cdot\text{m}^{-1}\cdot\text{K}^{-1}$ ) | Ref.      |
|--------|-------------------------|----------------|------------------------|-------------------------------------------------------------------------|-----------|
| SBR    | $\text{Ti}_3\text{C}_2$ | 4phr           | 11.1                   | 0.61                                                                    | This work |
| SBR    | GE <sup>a</sup>         | 5phr           | 16.2                   | 0.25                                                                    | 1         |
| SBR    | GE                      | 10.5 vol%      | ~5                     | ~0.43                                                                   | 2         |
| SBR    | RGO <sup>b</sup>        | 3 wt%          | ~4.6                   | ~0.27                                                                   | 3         |
| SBR    | GO <sup>c</sup>         | 4 phr          | ~8.5                   | ~0.19                                                                   | 4         |
| SBR    | BN <sup>d</sup>         | 10.5 vol%      | ~7                     | ~0.28                                                                   | 5         |
| SBR    | BNNS <sup>e</sup>       | 10.5 vol%      | ~16                    | ~0.43                                                                   | 5         |
| SBR    | CNTs <sup>f</sup>       | 10phr          | 4.5                    | ---                                                                     | 6         |
| SBR    | PCNTs <sup>g</sup>      | 3 wt%          | ~5.5                   | ~0.30                                                                   | 3         |
| SBR    | CNTs/CB <sup>h</sup>    | 7phr/40phr     | ~22                    | 0.30                                                                    | 7         |

<sup>a</sup> Graphene; <sup>b</sup> Reduced graphene oxide; <sup>c</sup> Graphene oxide; <sup>d</sup> Boron nitride; <sup>e</sup> Hexagonal boron nitride nanosheet; <sup>f</sup> Carbon nanotubes; <sup>g</sup> Polymer functionalized carbon nanotubes; <sup>h</sup> Carbon black.

## References:

- [1] Xing W, Tang M, Wu J, et al. Multifunctional properties of graphene/rubber nanocomposites fabricated by a modified latex compounding method. *Composites science and technology*, 2014, 99: 67-74.
- [2] Araby S, Meng Q, Zhang L, et al. Electrically and thermally conductive elastomer/graphene nanocomposites by solution mixing. *Polymer*, 2014, 55(1): 201-210.
- [3] Song S, Zhang Y. Carbon nanotube/reduced graphene oxide hybrid for

simultaneously enhancing the thermal conductivity and mechanical properties of styrene-butadiene rubber. *Carbon*, 2017, 123: 158-167.

[4] Yin B, Wang J, Jia H, He J, Zhang X, Xu Z. Enhanced mechanical properties and thermal conductivity of styrene-butadiene rubber reinforced with polyvinylpyrrolidone-modified graphene oxide. *Journal of Materials Science*. 2016;51(12):5724-5737.

[5] Wu X, Liu H, Tang Z, et al. Scalable fabrication of thermally conductive elastomer/boron nitride nanosheets composites by slurry compounding. *Composites Science and Technology*, 2016, 123: 179-186.

[6] Zhou X W, Zhu Y F, Liang J. Preparation and properties of powder styrene-butadiene rubber composites filled with carbon black and carbon nanotubes. *Materials research bulletin*, 2007, 42(3): 456-464.

[7] Fu Y, Yang C, Lvov Y M, et al. Antioxidant sustained release from carbon nanotubes for preparation of highly aging resistant rubber. *Chemical Engineering Journal*, 2017, 328: 536-545.
